# Supplementary material
Source: PubMed Central journal article supplement (PMC5522757)

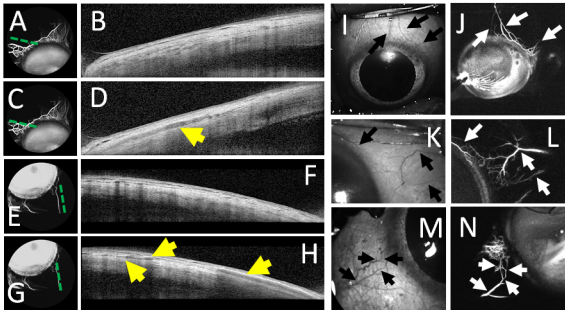

Supplement: NIHMS865838-supplement-1.pdf [file NIHMS865838-supplement-1.pdf]
